# Supplementary material for: Multitarget Anticancer Agents Based on Histone Deacetylase and Protein Kinase CK2 Inhibitors
Source: Molecules. 2020 Mar 25;25(7):1497. doi: 10.3390/molecules25071497 (PMC7180456; doi:10.3390/molecules25071497)
Supplement: Supplementary file 1 [file molecules-25-01497-s001.pdf]

## Supporting Information

### Multi-target Anticancer Agents Based on Histone Deacetylase and Protein Kinase CK2 inhibitors

Regina Martínez <sup>1</sup>, Bruno Di Geronimo <sup>1</sup>, Miryam Pastor <sup>1</sup>, José María Zapico <sup>1</sup>, Claire Coderch <sup>1</sup>, Rostyslav Panchuk <sup>2</sup>, Nadia Skorokhyd <sup>2</sup>, Maciej Maslyk <sup>3</sup>, Ana Ramos <sup>1,\*</sup> and Beatriz de Pascual-Teresa <sup>1,\*</sup>

- 
- <sup>1</sup> Departamento de Química y Bioquímica, Facultad de Farmacia, Universidad San Pablo-CEU, CEU Universities, Urbanización Montepríncipe, 28925, Alcorcón, Madrid, Spain.  
<sup>2</sup> Institute of Cell Biology, NAS of Ukraine, Drahomanov Str. 14/16, 79005, Lviv, Ukraine.  
<sup>3</sup> Department of Molecular Biology, Faculty of Biotechnology and Environment Sciences, The John Paul II Catholic University of Lublin, 20-718, Lublin, Poland.

#### Table of Contents:

|                                                                                                                                         | Pages   |
|-----------------------------------------------------------------------------------------------------------------------------------------|---------|
| 1 HPLC data; <sup>13</sup> C NMR and <sup>1</sup> H NMR of spectra of compounds <b>11a-d</b> , <b>7a-d</b> , <b>15a</b> and <b>19</b> . | S2-S17  |
| 2 <b>Figure 1S</b>                                                                                                                      | S18-S19 |
| 3 <b>Figure 2S</b>                                                                                                                      | S20     |
| 3 <b>Figure 3S</b>                                                                                                                      | S21     |
| 4 <b>Figure 4S</b>                                                                                                                      | S22     |
| 5 <b>Figure 5S</b>                                                                                                                      | S23     |
| 6 <b>Figure 6S</b>                                                                                                                      | S24-S25 |
| 7 <b>Figure 7S</b>                                                                                                                      | S26-S27 |
| 8 <b>Table 1S</b>                                                                                                                       | S28     |
| 9 <b>Table 2S</b>                                                                                                                       | S29     |
| 10 <b>Table 3S</b>                                                                                                                      | S30     |
| 11 <b>Table 4S</b>                                                                                                                      | S32     |
| 12 <b>Figure 8S</b>                                                                                                                     | S32     |

***N*-Hydroxy-5-(4,5,6,7-tetrabromo-2-(dimethylamino)-1*H*-benzo[*d*]imidazol-1-yl)pentanamide (11a)**

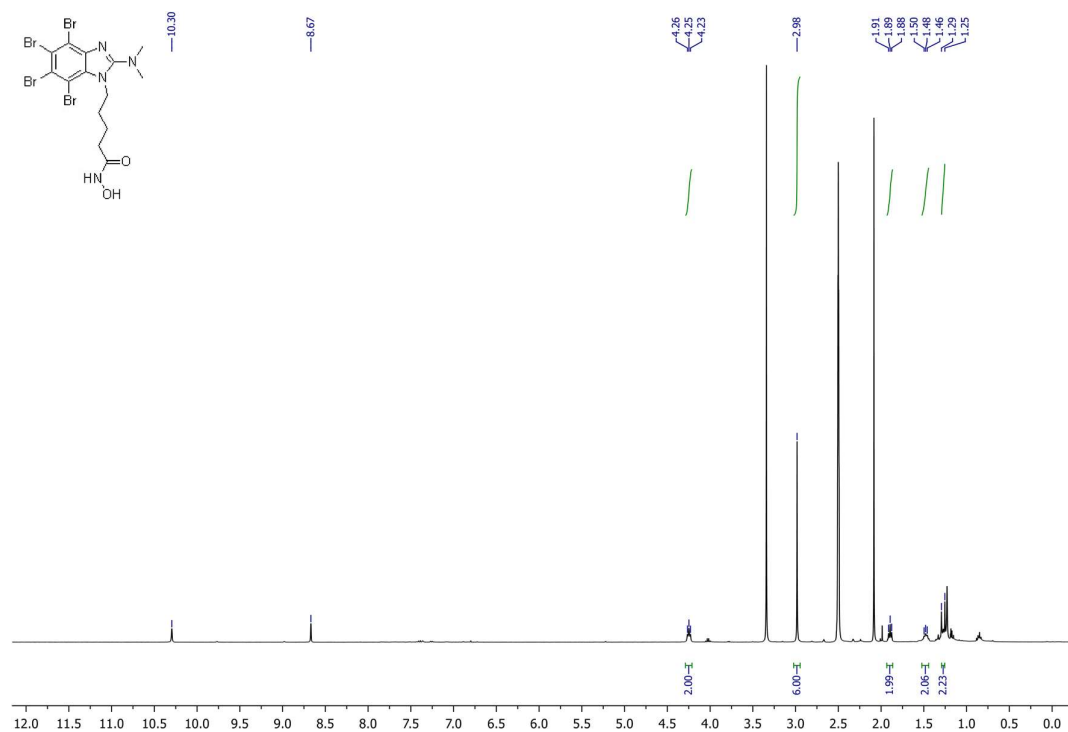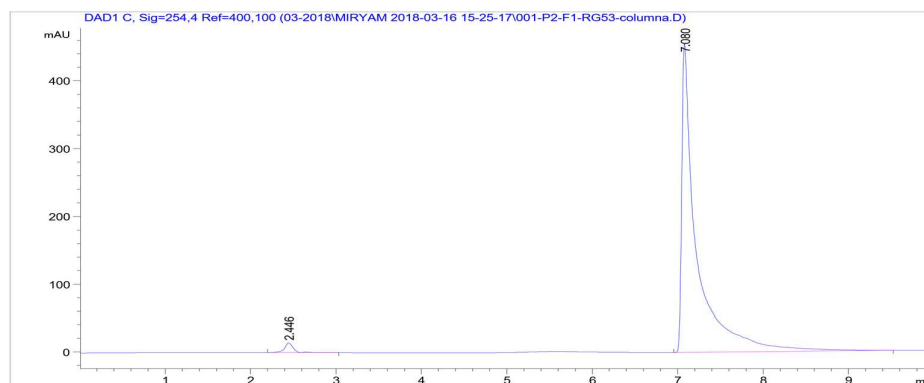

Signal 1: DAD1 C, Sig=254,4 Ref=400,100

| Peak # | RetTime [min] | Type | Width [min] | Area [mAU*s] | Height [mAU] | Area %  |
|--------|---------------|------|-------------|--------------|--------------|---------|
| 1      | 2.446         | BV R | 0.1081      | 102.73285    | 14.24945     | 1.8137  |
| 2      | 7.080         | BB   | 0.1603      | 5561.46387   | 456.00397    | 98.1863 |

Totals : 5664.19672 470.25342

**N-Hydroxy-6-(4,5,6,7-tetrabromo-2-(dimethylamino)-1H-benzo[d]imidazol-1-yl)hexanamide (11b)**

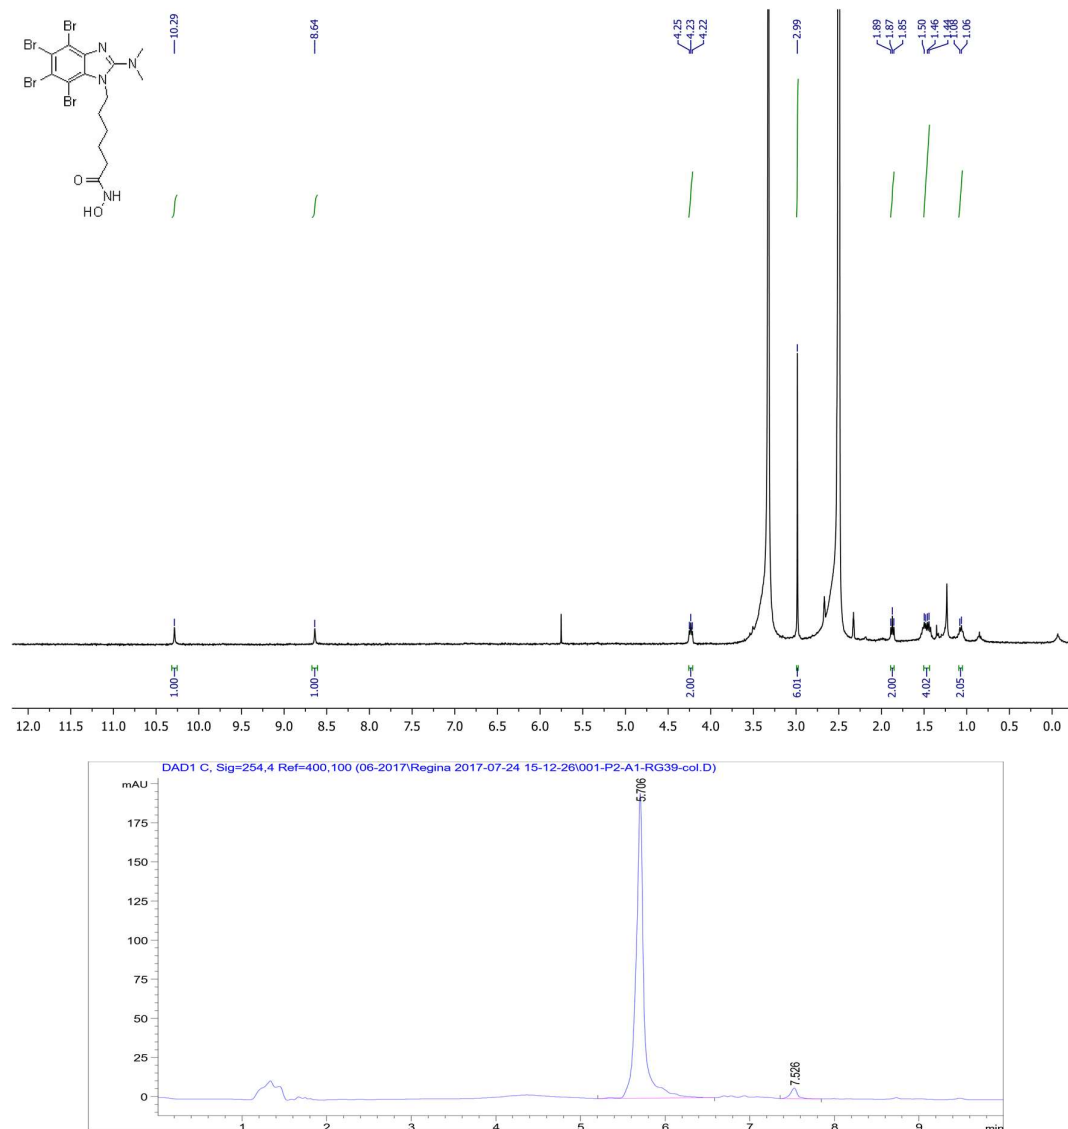

Signal 1: DAD1 C, Sig=254,4 Ref=400,100

| Peak # | RetTime [min] | Type | Width [min] | Area [mAU*s] | Height [mAU] | Area %  |
|--------|---------------|------|-------------|--------------|--------------|---------|
| 1      | 5.706         | BB   | 0.0911      | 1255.41211   | 195.07144    | 97.0298 |
| 2      | 7.526         | BB   | 0.0840      | 38.43026     | 6.79341      | 2.9702  |

Totals : 1293.84237 201.86485

**N-Hydroxy-7-(4,5,6,7-tetrabromo-2-(dimethylamino)-1H-benzo[d]imidazol-1-yl)heptanamide (11c)**

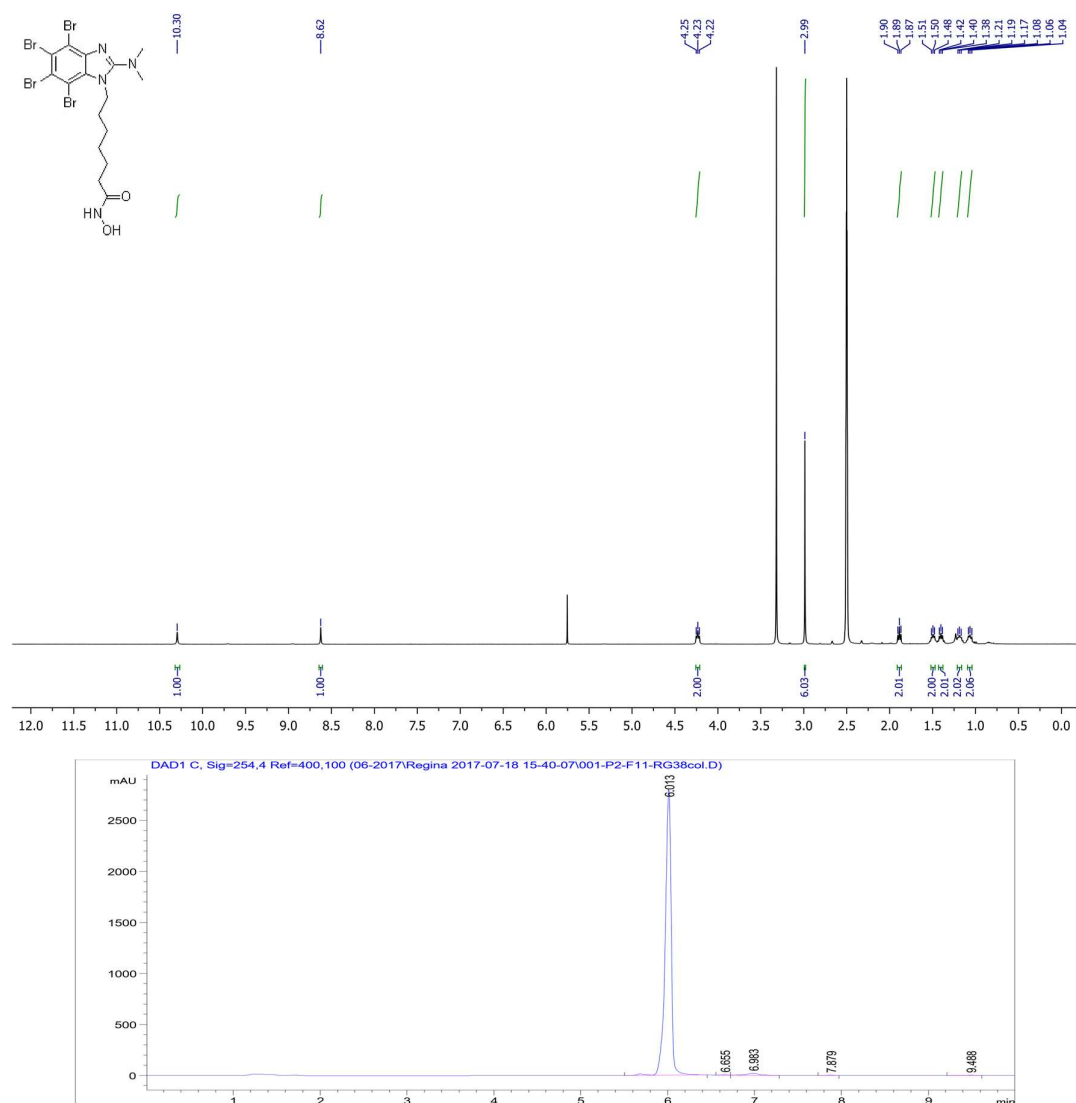

Signal 1: DAD1 C, Sig=254,4 Ref=400,100

| Peak # | RetTime [min] | Type | Width [min] | Area [mAU*s] | Height [mAU] | Area %  |
|--------|---------------|------|-------------|--------------|--------------|---------|
| 1      | 6.013         | VB R | 0.0714      | 1.34746e4    | 2814.50049   | 98.0701 |
| 2      | 6.655         | BV   | 0.0582      | 21.47060     | 5.66641      | 0.1563  |
| 3      | 6.983         | VB   | 0.1598      | 206.18138    | 19.43099     | 1.5006  |
| 4      | 7.879         | BB   | 0.0677      | 15.60688     | 3.52331      | 0.1136  |
| 5      | 9.488         | BB   | 0.0879      | 21.90463     | 3.65501      | 0.1594  |

Totals : 1.37397e4 2846.77620

***N*-Hydroxy-8-(4,5,6,7-tetrabromo-2-(dimethylamino)-1*H*-benzo[*d*]imidazol-1-yl)octanamide  
(11d)**

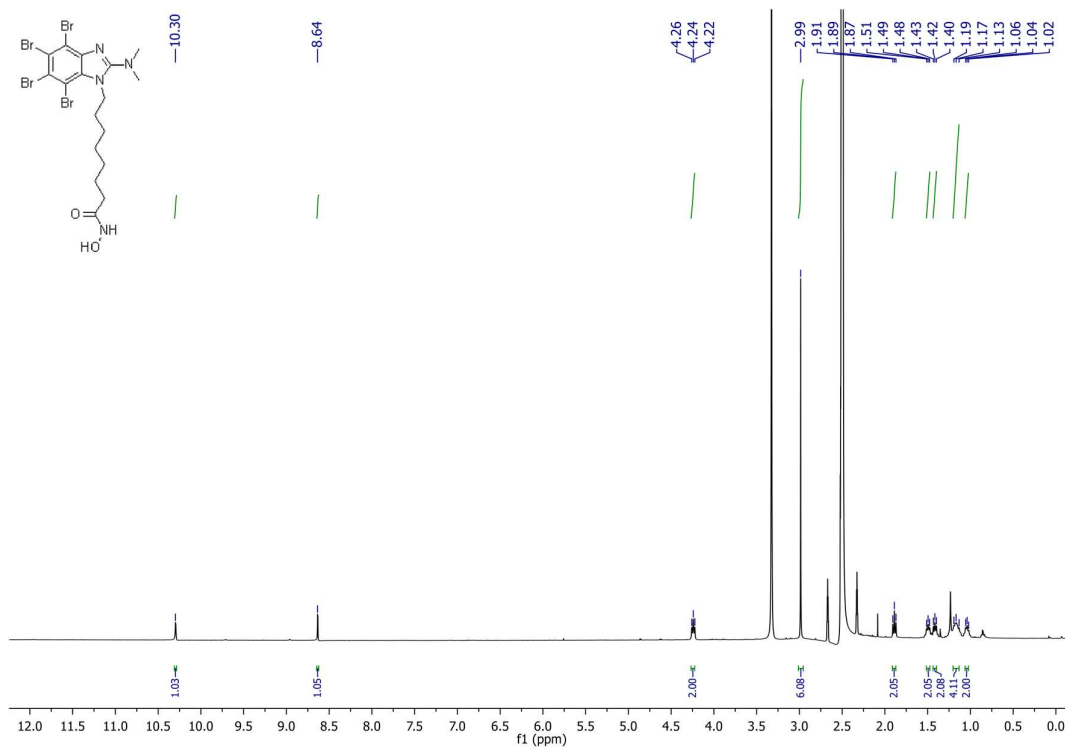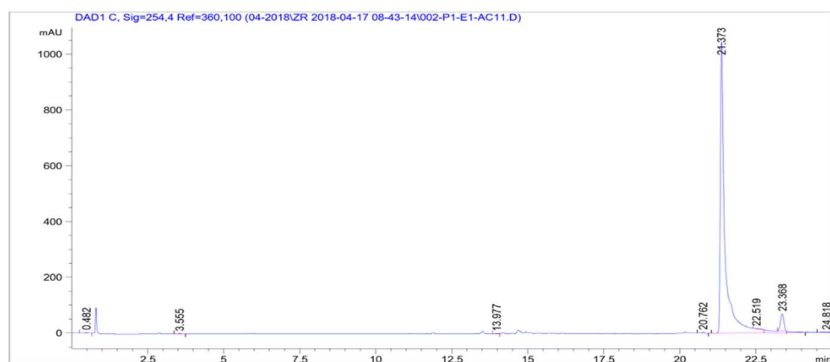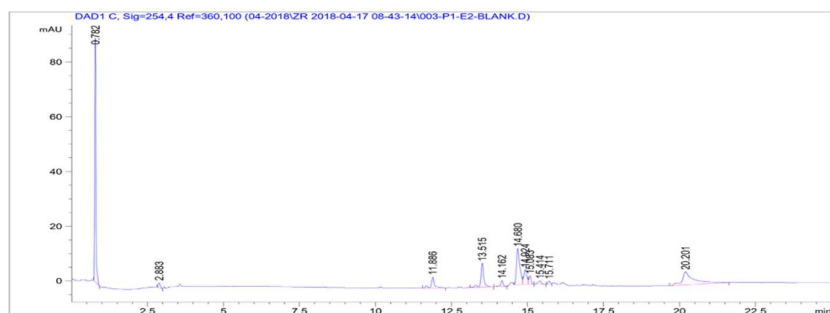

Signal 1: DAD1 C, Sig=254,4 Ref=360,100

| Peak<br># | RetTime<br>[min] | Type | Width<br>[min] | Area<br>[mAU*s] | Height<br>[mAU] | Area<br>% |
|-----------|------------------|------|----------------|-----------------|-----------------|-----------|
| 1         | 0.482            | BB   | 0.1579         | 19.23498        | 1.93644         | 0.1646    |
| 2         | 3.555            | BB   | 0.0685         | 5.18632         | 1.15253         | 0.0444    |
| 3         | 13.977           | BV   | 0.0945         | 6.41406         | 1.00500         | 0.0549    |
| 4         | 20.762           | BB   | 0.0939         | 20.38050        | 3.30734         | 0.1744    |
| 5         | 21.373           | BV R | 0.1458         | 1.11087e4       | 1046.84460      | 95.0811   |
| 6         | 22.519           | VV E | 0.1938         | 26.92827        | 1.80767         | 0.2305    |
| 7         | 23.368           | VB E | 0.1185         | 473.02039       | 62.33468        | 4.0487    |
| 8         | 24.818           | BBA  | 0.2264         | 23.52219        | 1.35572         | 0.2013    |

Totals : 1.16833e4 1119.74398

**N-Hydroxy-4-(4-((4,5,6,7-tetrabromo-2-(dimethylamino)-1H-benzo[d]imidazol-1-yl)methyl)-1H-1,2,3-triazol-1-yl)butanamide (7a)**

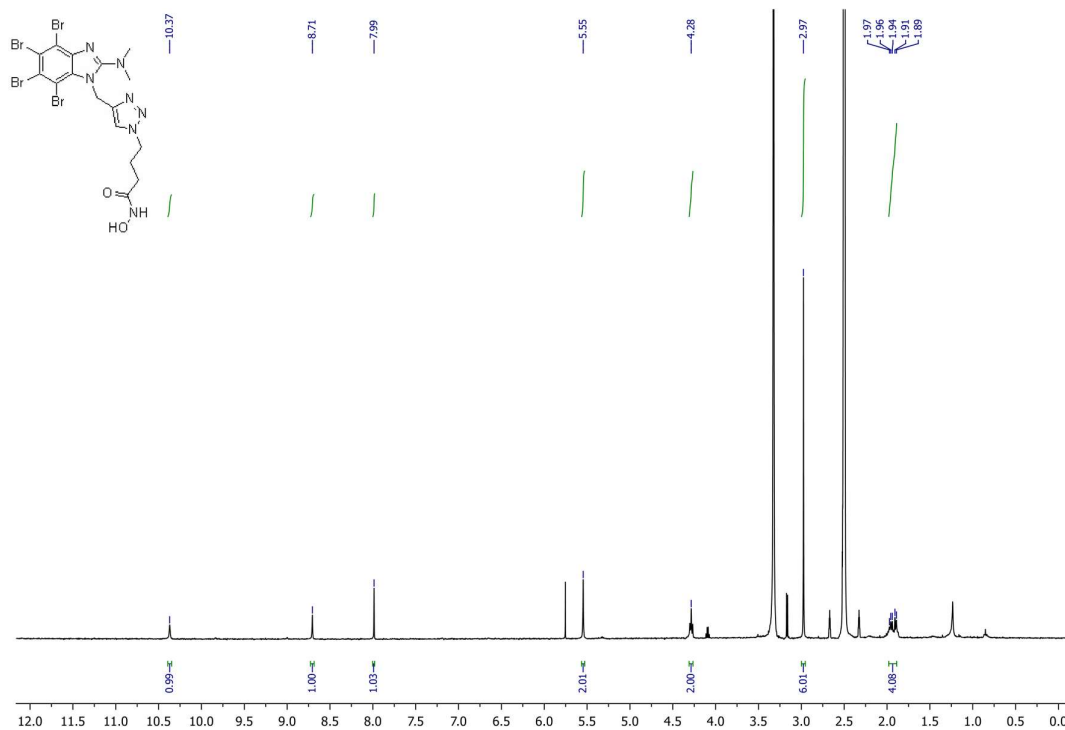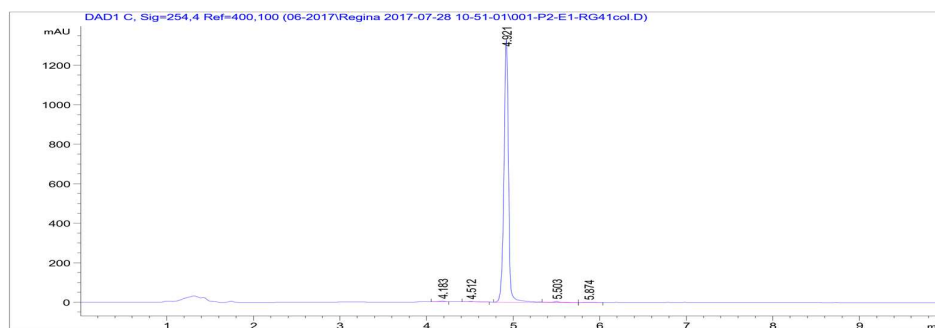

Signal 1: DAD1 C, Sig=254,4 Ref=400,100

| Peak # | RetTime [min] | Type | Width [min] | Area [mAU*s] | Height [mAU] | Area %  |
|--------|---------------|------|-------------|--------------|--------------|---------|
| 1      | 4.183         | BB   | 0.0585      | 12.17241     | 3.19194      | 0.2530  |
| 2      | 4.512         | BB   | 0.0889      | 9.41010      | 1.46527      | 0.1956  |
| 3      | 4.921         | BV R | 0.0556      | 4761.73730   | 1336.29236   | 98.9677 |
| 4      | 5.503         | VV E | 0.0708      | 19.04000     | 3.91370      | 0.3957  |
| 5      | 5.874         | VB   | 0.1027      | 9.04547      | 1.18934      | 0.1880  |

Totals : 4811.40529 1346.05262

**N-Hydroxy-5-(4-((4,5,6,7-tetrabromo-2-(dimethylamino)-1H-benzo[d]imidazol-1-yl)methyl)-1H-1,2,3-triazol-1-yl)pentanamide (7b)**

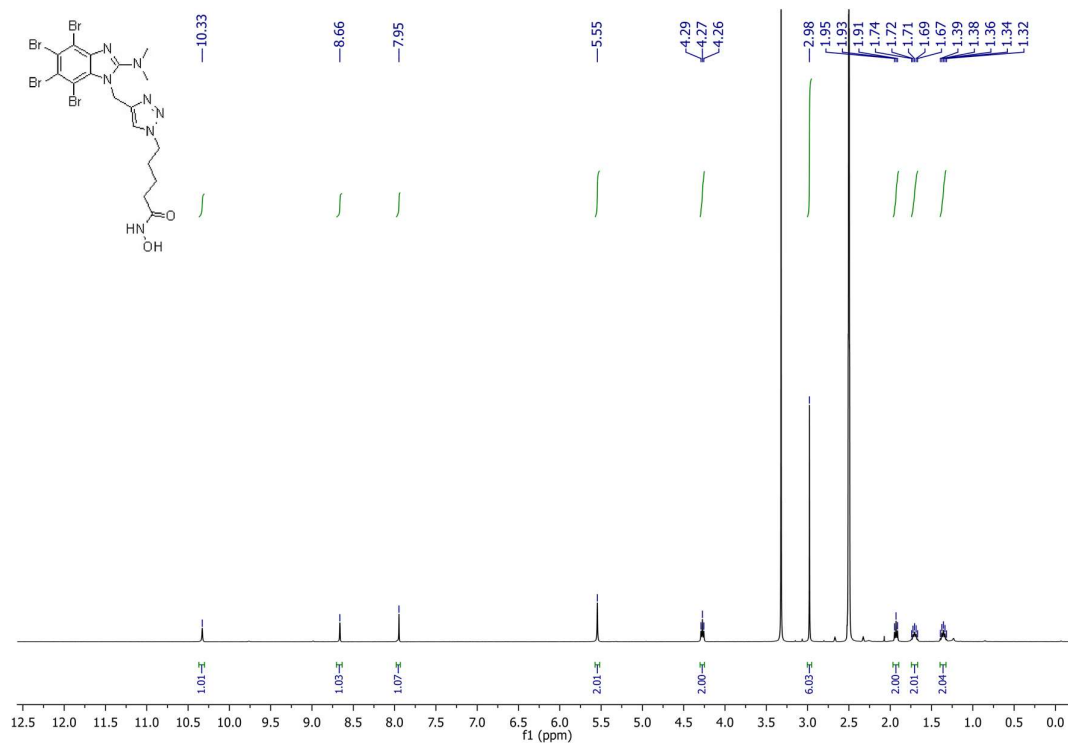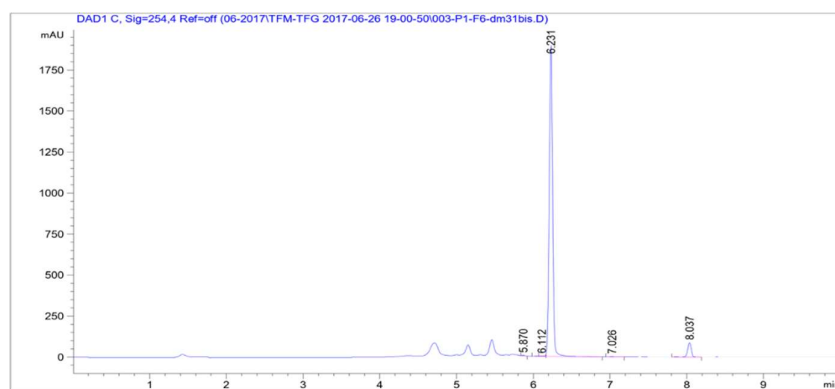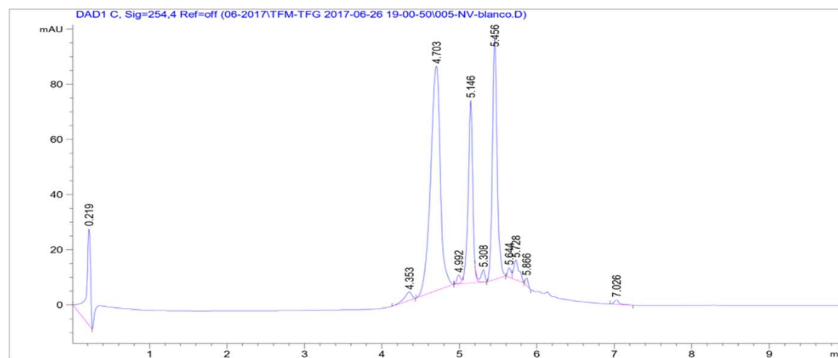

Signal 1: DAD1 C, Sig=254,4 Ref=off

| Peak<br># | RetTime<br>[min] | Type | Width<br>[min] | Area<br>[mAU*s] | Height<br>[mAU] | Area<br>% |
|-----------|------------------|------|----------------|-----------------|-----------------|-----------|
| 1         | 5.870            | BB   | 0.0412         | 7.60626         | 3.03399         | 0.1215    |
| 2         | 6.112            | VV E | 0.0573         | 10.10914        | 2.72607         | 0.1615    |
| 3         | 6.231            | VB R | 0.0506         | 5961.39844      | 1900.22595      | 95.2432   |
| 4         | 7.026            | BB   | 0.0629         | 7.36980         | 1.75839         | 0.1177    |
| 5         | 8.037            | VB R | 0.0502         | 272.64691       | 87.76031        | 4.3560    |
| Totals :  |                  |      |                | 6259.13055      | 1995.50472      |           |

***N*-Hydroxy-3-(4-(2-(4,5,6,7-tetrabromo-2-(dimethylamino)-1*H*-benzo[*d*]imidazol-1-yl)ethyl)-1*H*-1,2,3-triazol-1-yl)propanamide (7c)**

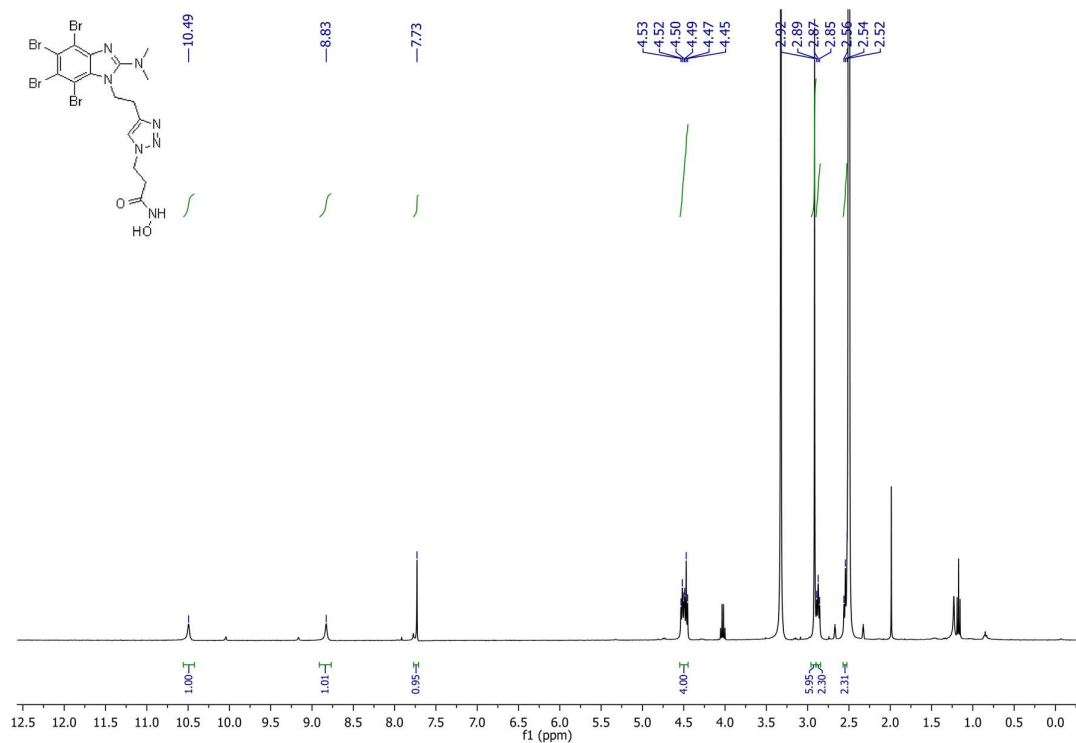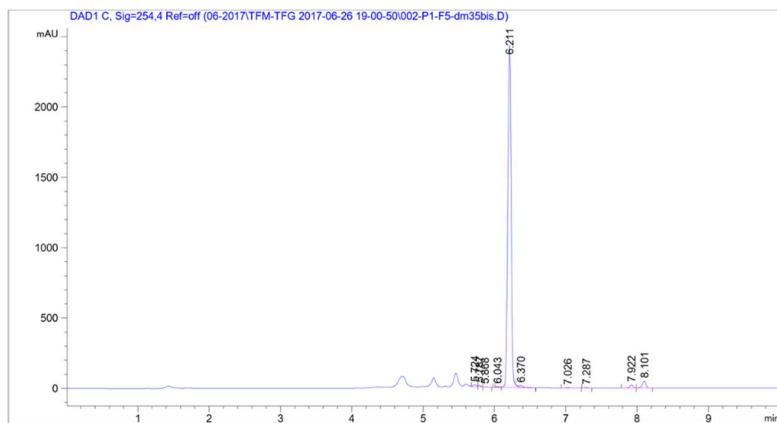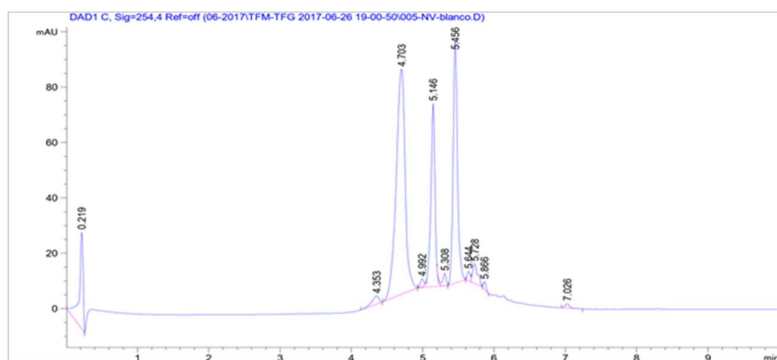

Signal 1: DAD1 C, Sig=254,4 Ref=off

| Peak<br># | RetTime<br>[min] | Type | Width<br>[min] | Area<br>[mAU*s] | Height<br>[mAU] | Area<br>% |
|-----------|------------------|------|----------------|-----------------|-----------------|-----------|
| 1         | 5.724            | VV   | 0.0561         | 50.68787        | 13.39521        | 0.6075    |
| 2         | 5.787            | VB   | 0.0423         | 25.12651        | 9.06702         | 0.3011    |
| 3         | 5.868            | BB   | 0.0421         | 5.56397         | 2.15571         | 0.0667    |
| 4         | 6.043            | BV E | 0.0435         | 10.05735        | 3.97738         | 0.1205    |
| 5         | 6.211            | VV R | 0.0518         | 7909.91650      | 2442.92969      | 94.7956   |
| 6         | 6.370            | VB E | 0.0670         | 55.43245        | 11.76695        | 0.6643    |
| 7         | 7.026            | BB   | 0.0658         | 7.73054         | 1.73999         | 0.0926    |
| 8         | 7.287            | BB   | 0.0487         | 15.26694        | 5.13314         | 0.1830    |
| 9         | 7.922            | BV   | 0.0513         | 80.69362        | 23.95649        | 0.9671    |
| 10        | 8.101            | VB   | 0.0539         | 183.70345       | 51.14900        | 2.2016    |
| Totals :  |                  |      |                | 8344.17919      | 2565.27057      |           |

**N-Hydroxy-4-(4-(2-(4,5,6,7-tetrabromo-2-(dimethylamino)-1H-benzo[d]imidazol-1-yl)ethyl)-1H-1,2,3-triazol-1-yl)butanamide (7d)**

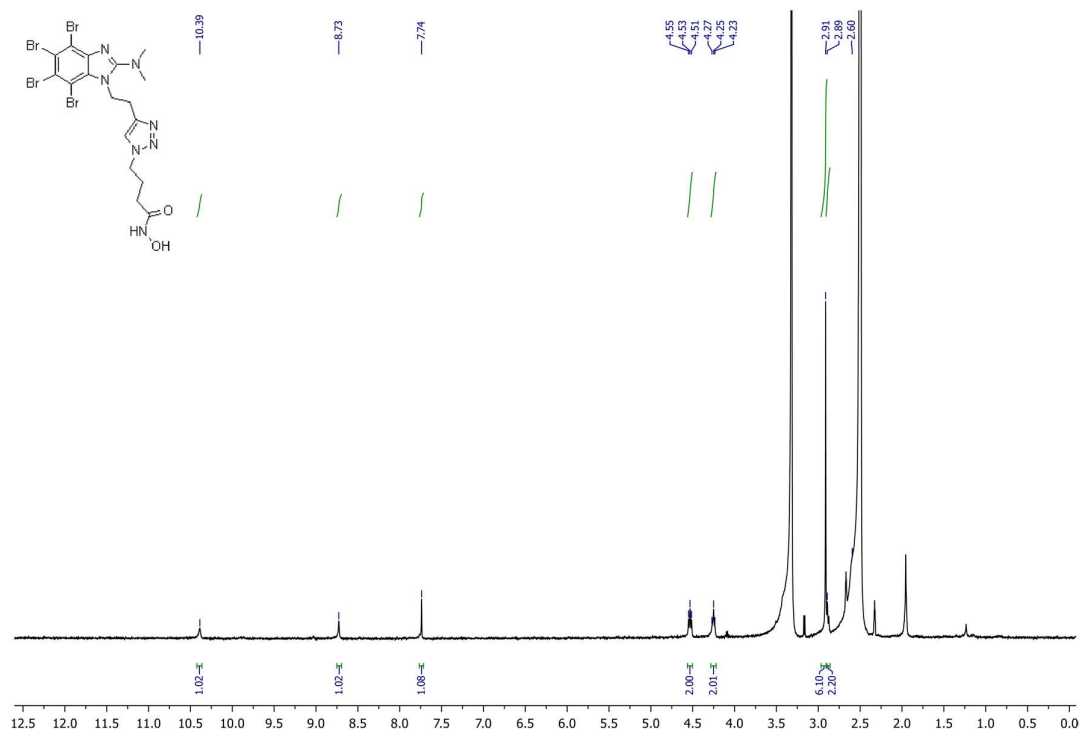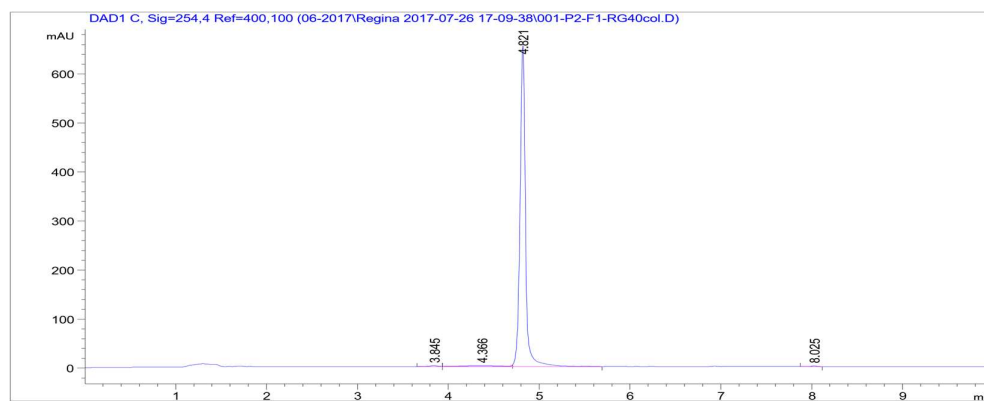

Signal 1: DAD1 C, Sig=254,4 Ref=400,100

| Peak # | RetTime [min] | Type | Width [min] | Area [mAU*s] | Height [mAU] | Area %  |
|--------|---------------|------|-------------|--------------|--------------|---------|
| 1      | 3.845         | BB   | 0.0823      | 10.92274     | 1.92117      | 0.3890  |
| 2      | 4.366         | BV E | 0.3453      | 48.39608     | 1.87415      | 1.7234  |
| 3      | 4.821         | VV R | 0.0628      | 2742.30640   | 655.64117    | 97.6563 |
| 4      | 8.025         | BB   | 0.0624      | 6.49529      | 1.63441      | 0.2313  |

Totals : 2808.12051 661.07091

**N-hydroxy-4-((perbromo-2H-benzo[d][1,2,3]triazol-2-yl)methyl)benzamide (15a)**

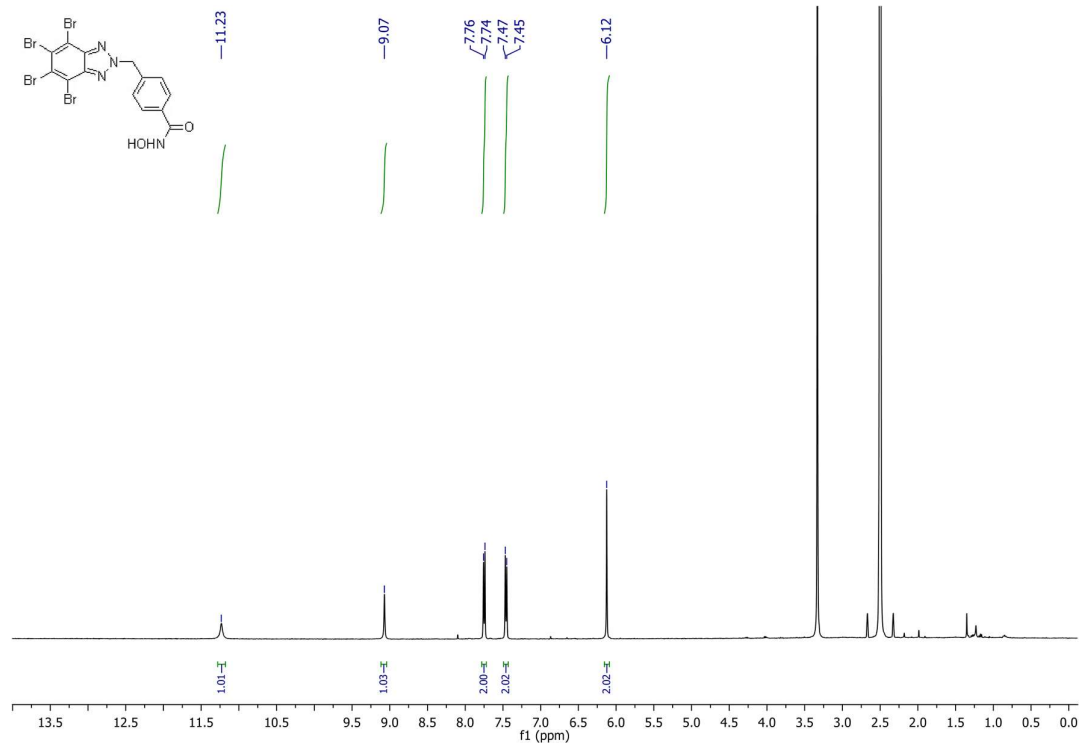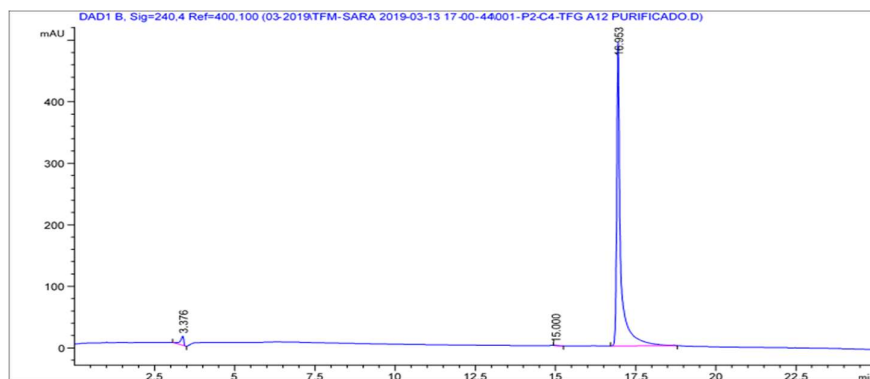

Signal 1: DAD1 B, Sig=240,4 Ref=400,100

| Peak # | RetTime [min] | Type | Width [min] | Area [mAU*s] | Height [mAU] | Area % |
|--------|---------------|------|-------------|--------------|--------------|--------|
| 1      | 3.376         | BB   | 0.1028      | 108.81815    | 14.97678     | 2.5030 |
| 2      | 15.000        | VB   | 0.0794      | 7.21641      | 1.37051      | 0.1660 |

| Peak # | RetTime [min] | Type | Width [min] | Area [mAU*s] | Height [mAU] | Area %  |
|--------|---------------|------|-------------|--------------|--------------|---------|
| 3      | 16.953        | BV R | 0.1201      | 4231.44922   | 493.33005    | 97.3310 |

Totals : 4347.48378 509.67734

**N-hydroxy-4-((perbromo-1H-benzo[d][1,2,3]triazol-1-yl)methyl)benzamide (15b)**

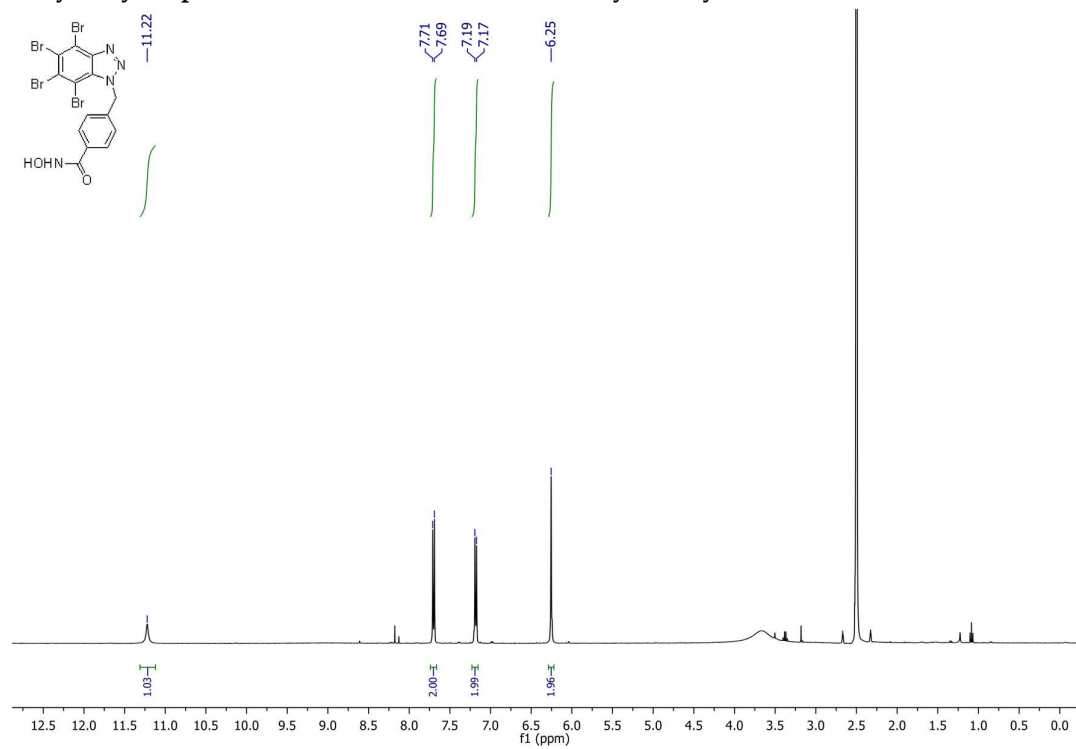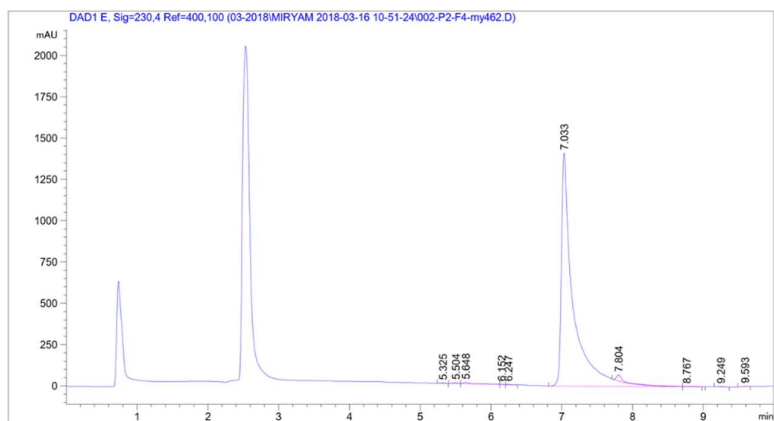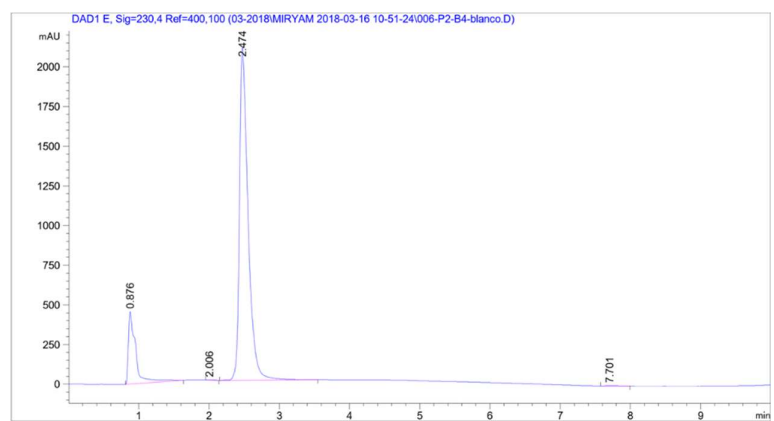

Signal 1: DAD1 E, Sig=230,4 Ref=400,100

| Peak<br># | RetTime<br>[min] | Type | Width<br>[min] | Area<br>[mAU*s] | Height<br>[mAU] | Area<br>% |
|-----------|------------------|------|----------------|-----------------|-----------------|-----------|
| 1         | 5.325            | BB   | 0.0810         | 9.72930         | 2.06216         | 0.0581    |
| 2         | 5.504            | BV   | 0.0694         | 26.04988        | 5.69306         | 0.1555    |
| 3         | 5.648            | VV   | 0.1317         | 85.87582        | 8.96607         | 0.5125    |
| 4         | 6.152            | VV   | 0.0642         | 8.05488         | 1.87321         | 0.0481    |
| 5         | 6.247            | VB   | 0.0618         | 10.84912        | 2.64667         | 0.0648    |
| 6         | 7.033            | BV R | 0.1547         | 1.62896e4       | 1410.75134      | 97.2238   |
| 7         | 7.804            | VV E | 0.1023         | 276.67804       | 37.41324        | 1.6513    |
| 8         | 8.767            | VB E | 0.1558         | 17.99244        | 1.59307         | 0.1074    |
| 9         | 9.249            | BB   | 0.0814         | 16.90264        | 3.21241         | 0.1009    |
| 10        | 9.593            | BB   | 0.0756         | 13.00847        | 2.72793         | 0.0776    |

Totals : 1.67548e4 1476.93917

***N*-hydroxy-4-((4,5,6,7-tetrabromo-2-(dimethylamino)-1*H*-benzo[*d*]imidazol-1-yl)methyl)benzamide (19)**

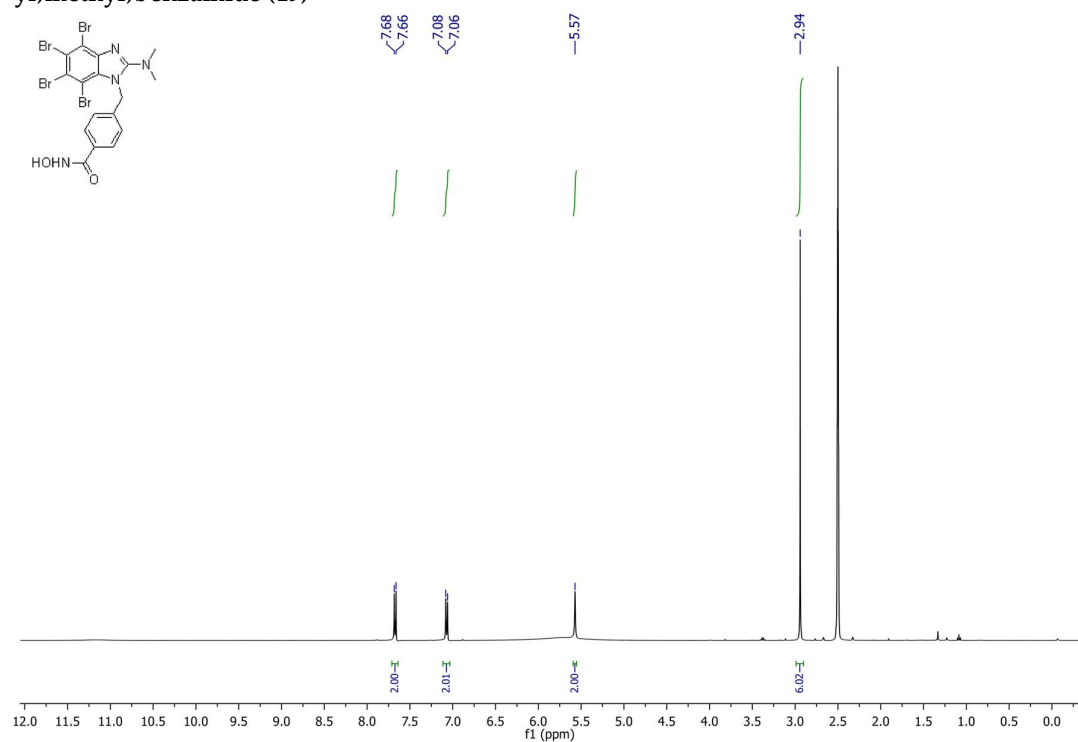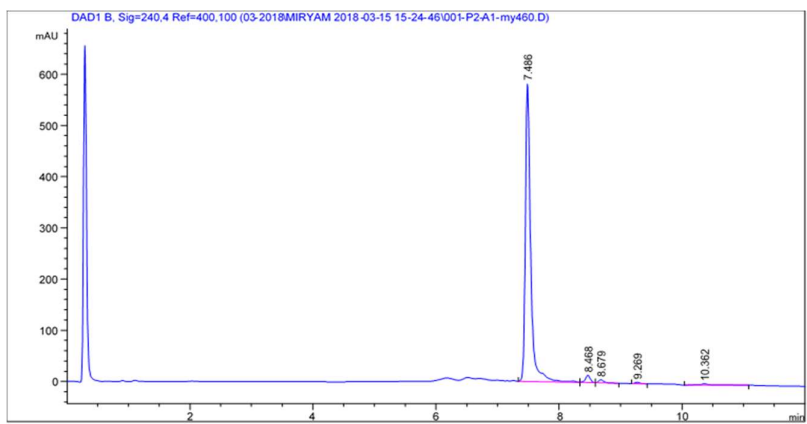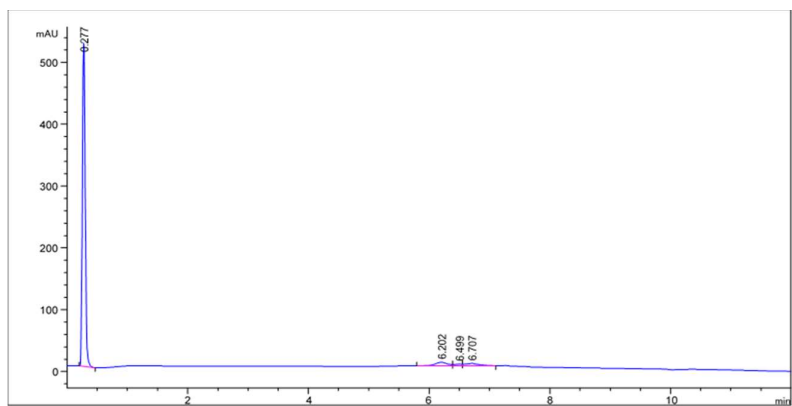

Signal 1: DAD1 B, Sig=240,4 Ref=400,100

| Peak<br># | RetTime<br>[min] | Type | Width<br>[min] | Area<br>[mAU*s] | Height<br>[mAU] | Area<br>% |
|-----------|------------------|------|----------------|-----------------|-----------------|-----------|
| 1         | 7.486            | BV R | 0.0878         | 3493.92505      | 581.92426       | 94.9975   |
| 2         | 8.468            | VB   | 0.0782         | 75.26643        | 14.11689        | 2.0464    |
| 3         | 8.679            | BB   | 0.0847         | 34.41696        | 6.02324         | 0.9358    |
| 4         | 9.269            | BB   | 0.0808         | 14.32347        | 2.74979         | 0.3894    |
| 5         | 10.362           | BB   | 0.2474         | 59.98135        | 3.07677         | 1.6309    |
| Totals :  |                  |      |                | 3677.91326      | 607.89094       |           |

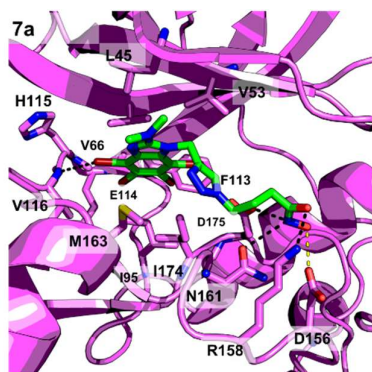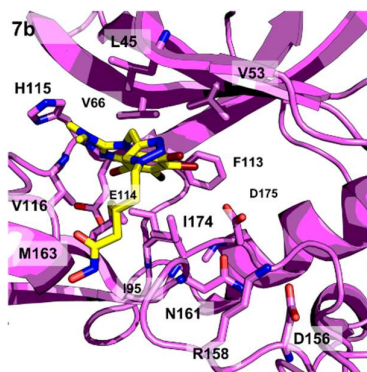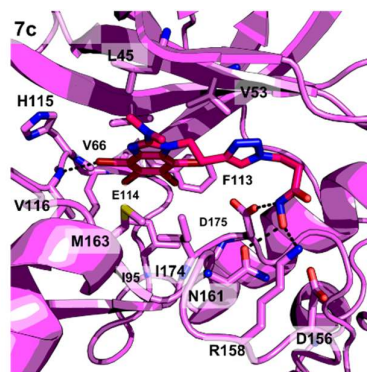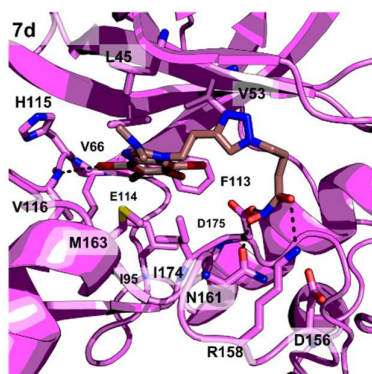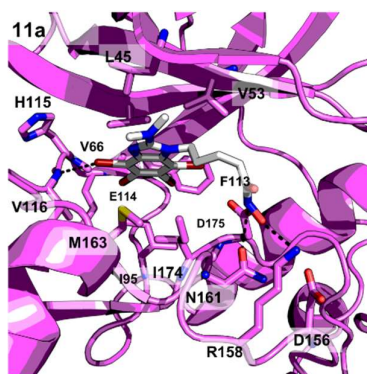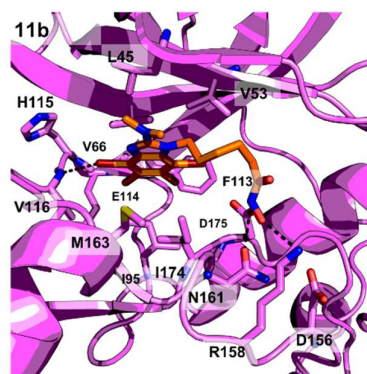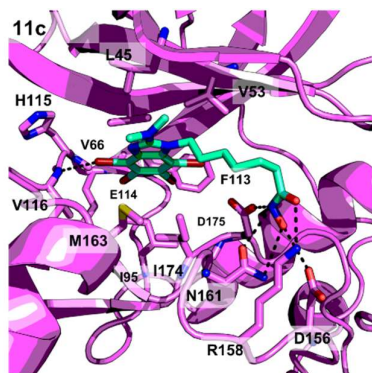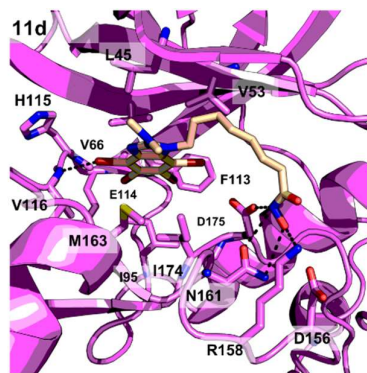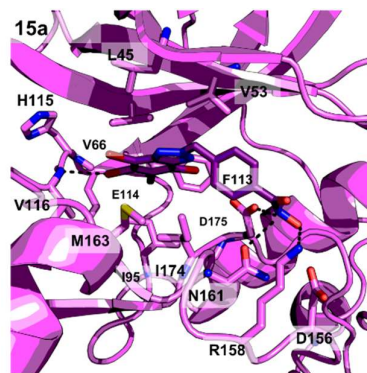

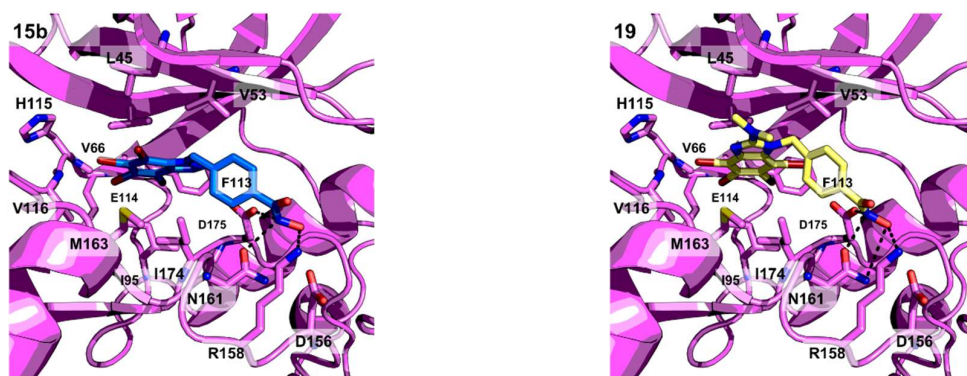

**Figure 1S:** PyMOL stick and cartoon representation of the best docking poses obtained for the set of compounds in CK2. For the sake of clarity, only heavy atoms are shown.

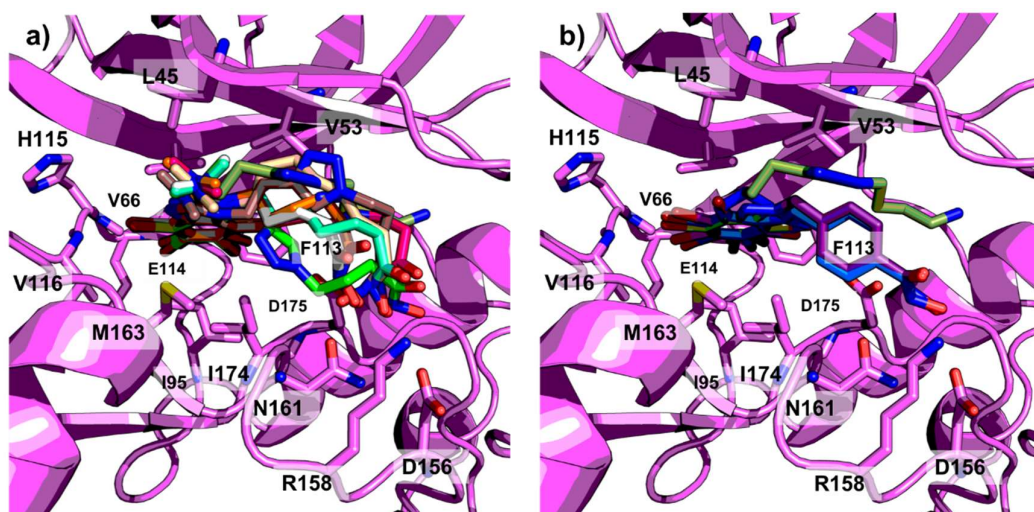

**Figure 2S:** PyMOL stick and cartoon representation of the best docking poses compared with the binding of the reference compound **JRJ** (colored in olive green) within CK2. **a)** binding of compounds **11a-d**, **7a**, **7d** and **19** that achieve a perfect superimposition of the TBI moiety with that of **JRJ**. **b)** binding of compounds **15a-b** that present a different orientation of the TBB moiety compared to reference compound **JRJ**.

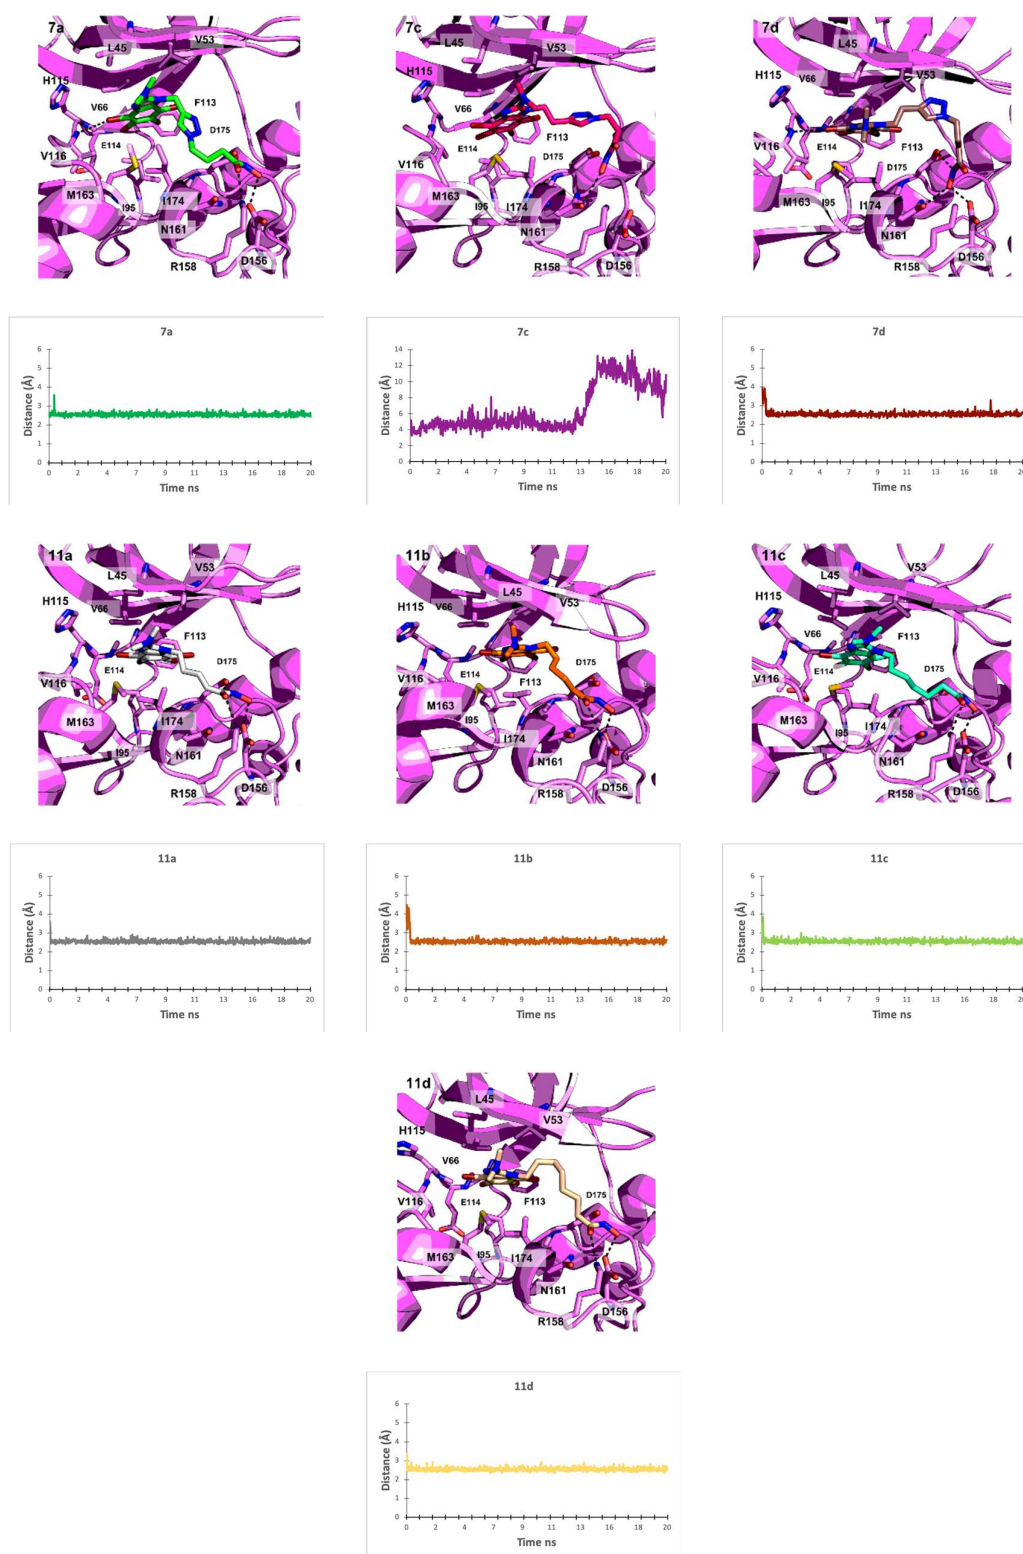

**Figure 3S.** PyMOL stick and cartoon representation of the complexes of the most populated conformers of compounds 7a, 7c, 7d and 11a-d with CK2. Graphical representations of the evolution during the entire simulation time (ns) of the hydrogen bond interaction established between the hydroxamic acid and the side chain of Asp156.

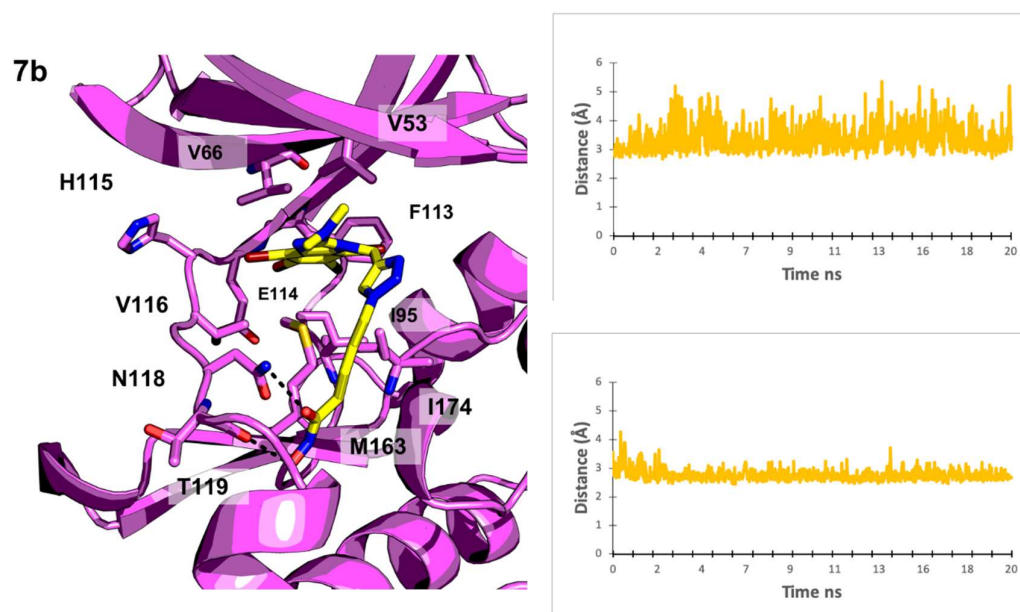

**Figure 4S:** PyMOL stick and cartoon representation of the complex of most the populated conformer of compound **7b** within CK2. Graphical representations of the evolution during the entire simulation time (ns) of the hydrogen bond interaction established between the hydroxamic acid and the side chain and backbone of Asn118 (top) and Thr119 (bottom), respectively.

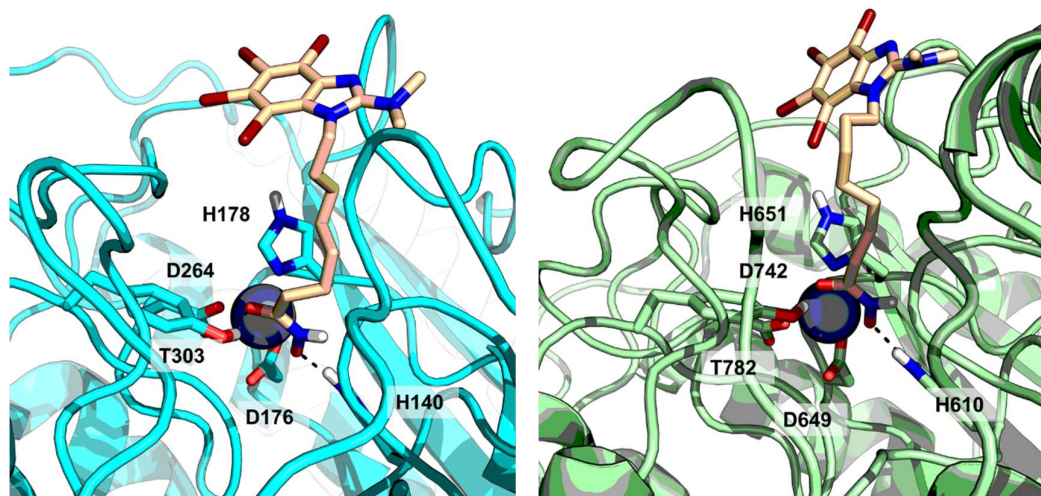

**Figure 5S:** PyMOL stick and cartoon representation of the bidentate chelation and hydrogen bond stabilization to the catalytic site of HDAC1 (left) and HDAC6 (right) of the hydroxamate of compound **11d** selected as representation of the binding of all of the compounds studied.

7a

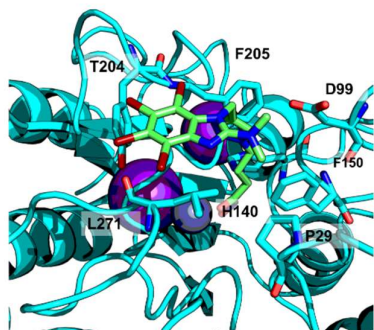

7b

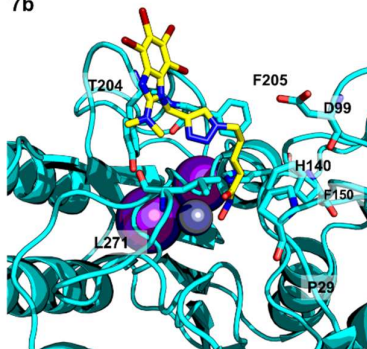

7c

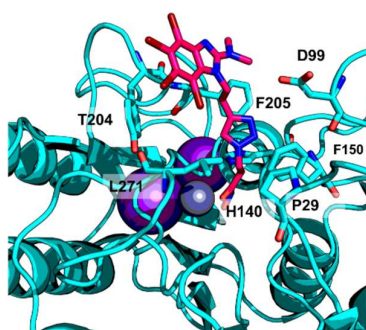

7d

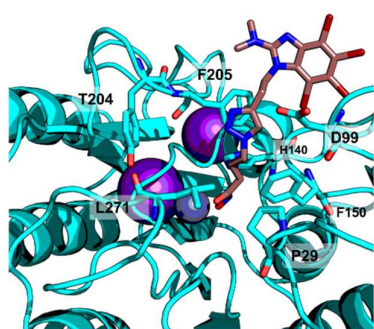

11a

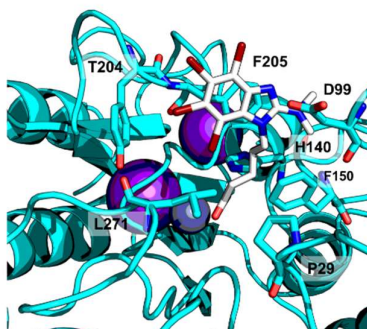

11b

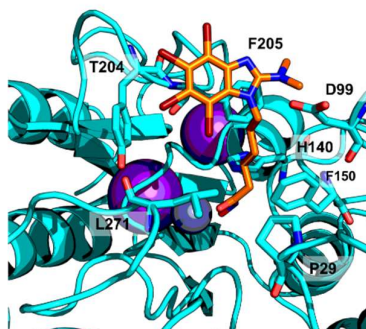

11c

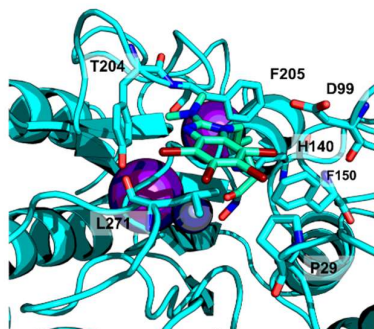

11d

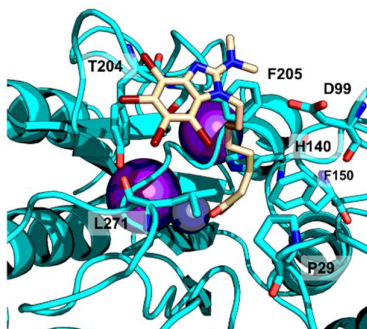

15a

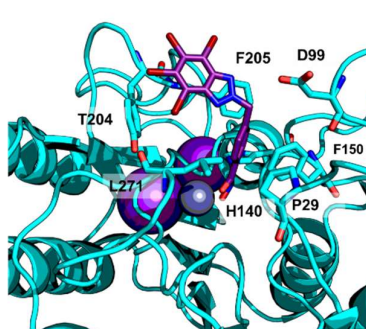

15b

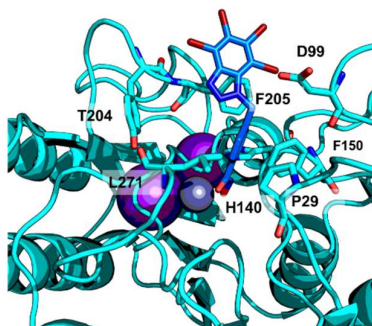

19

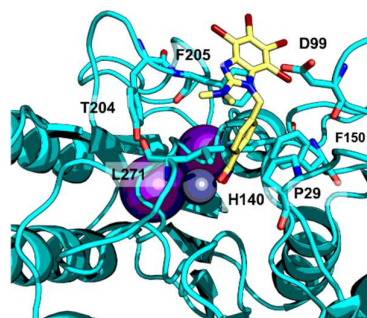

**Figure 6S:** PyMOL stick and cartoon representation of the best docking poses obtained for the set of compounds in HDAC1. For the sake of clarity only heavy atoms are shown.

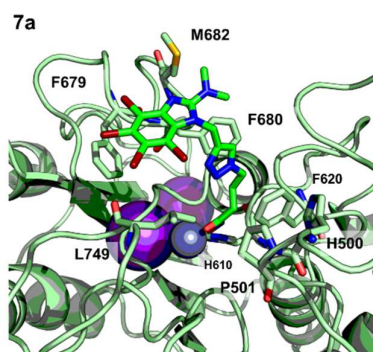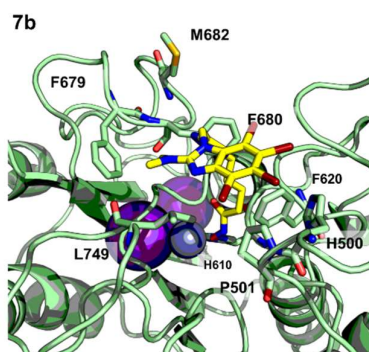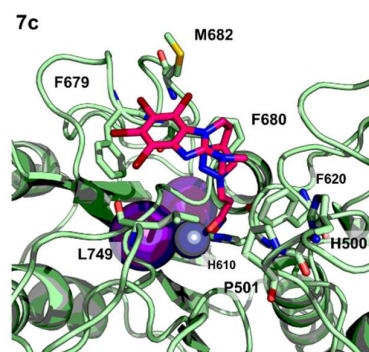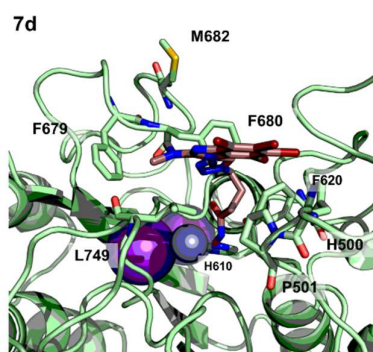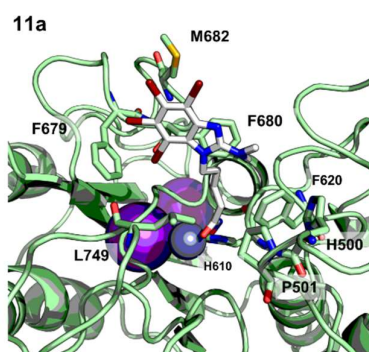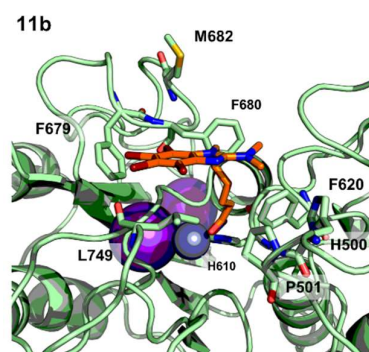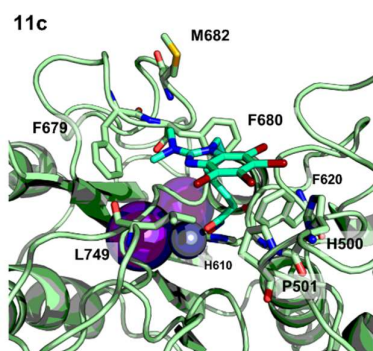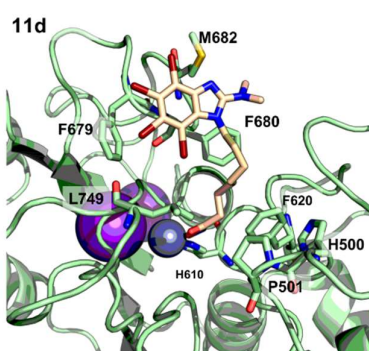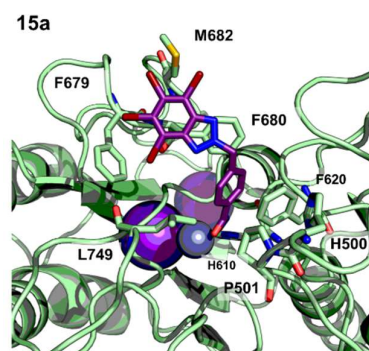

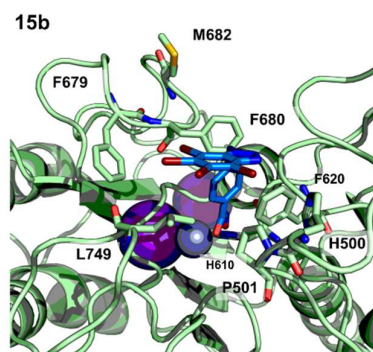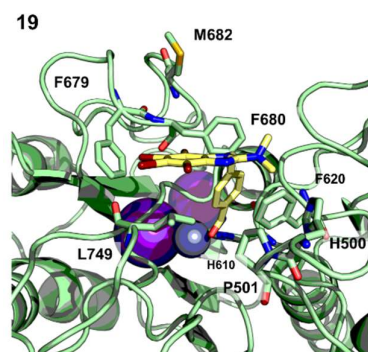

**Figure 7S:** PyMOL stick and cartoon representation of the best docking poses obtained for the set of compounds in HDAC6. For the sake of clarity only heavy atoms are shown.

**Table 1S:** RMSD ( $\text{\AA}$ ) values of the set of compounds in complex with CK2.

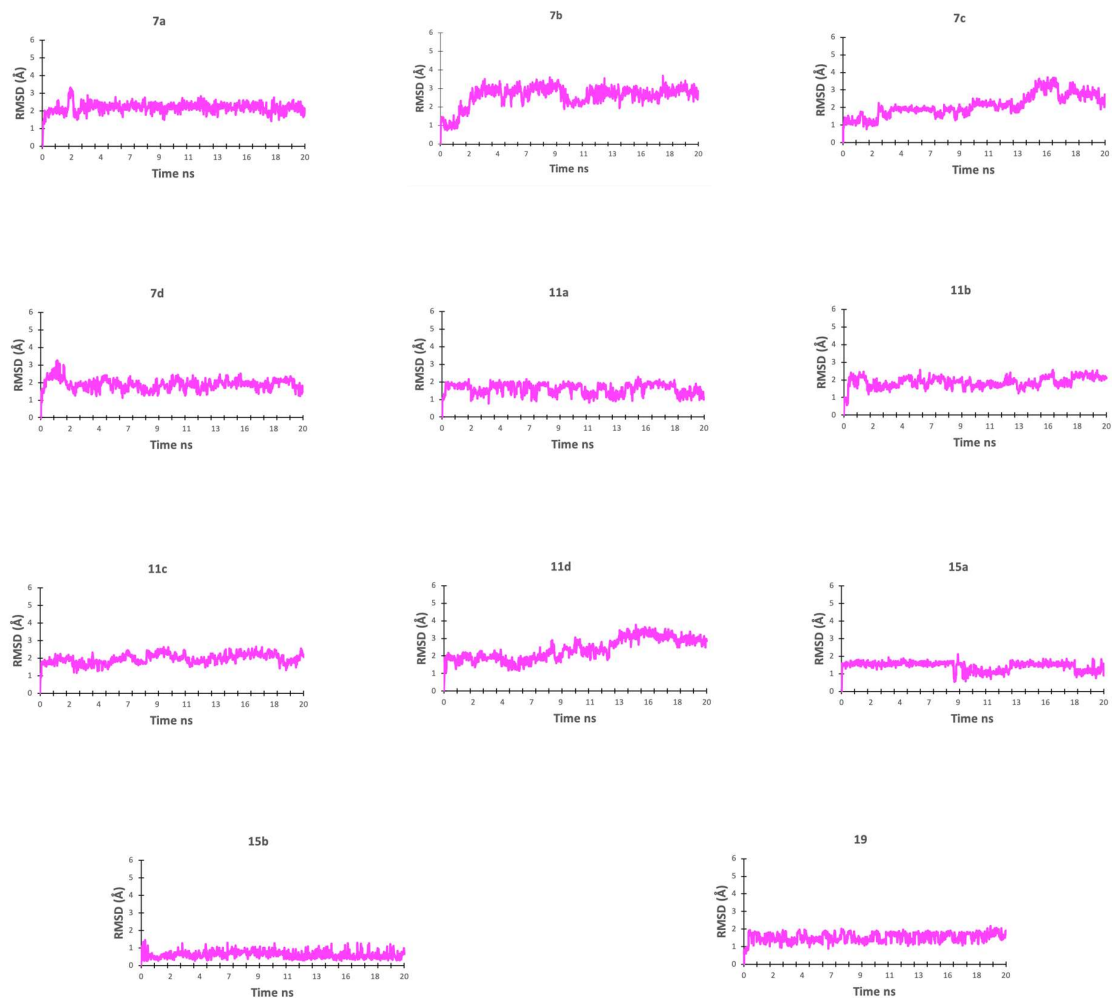

**Table 2S:** RMSD ( $\text{\AA}$ ) values of the set of compounds in complex with HDAC1.

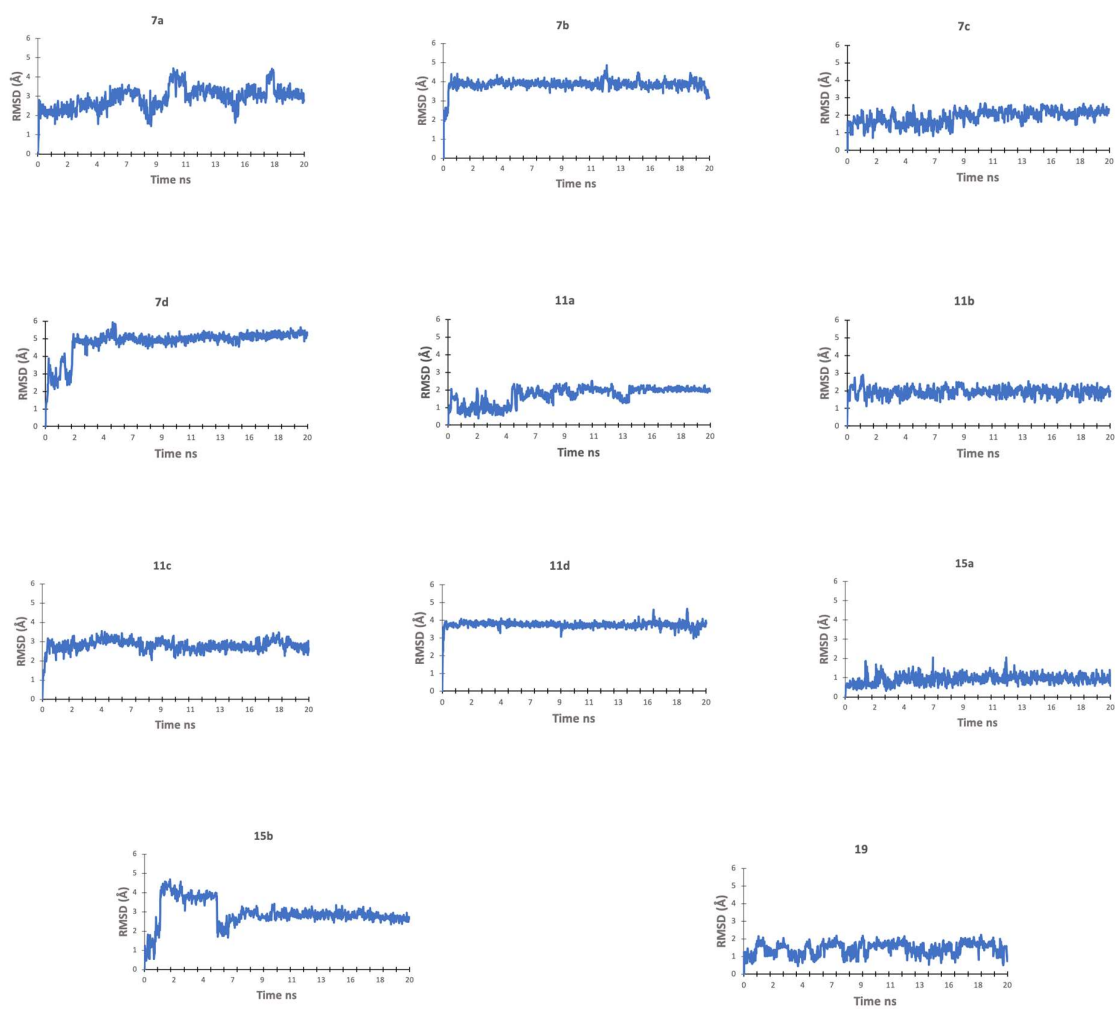

**Table 3S:** RMSD ( $\text{\AA}$ ) values of the set of compounds in complex with HDAC6.

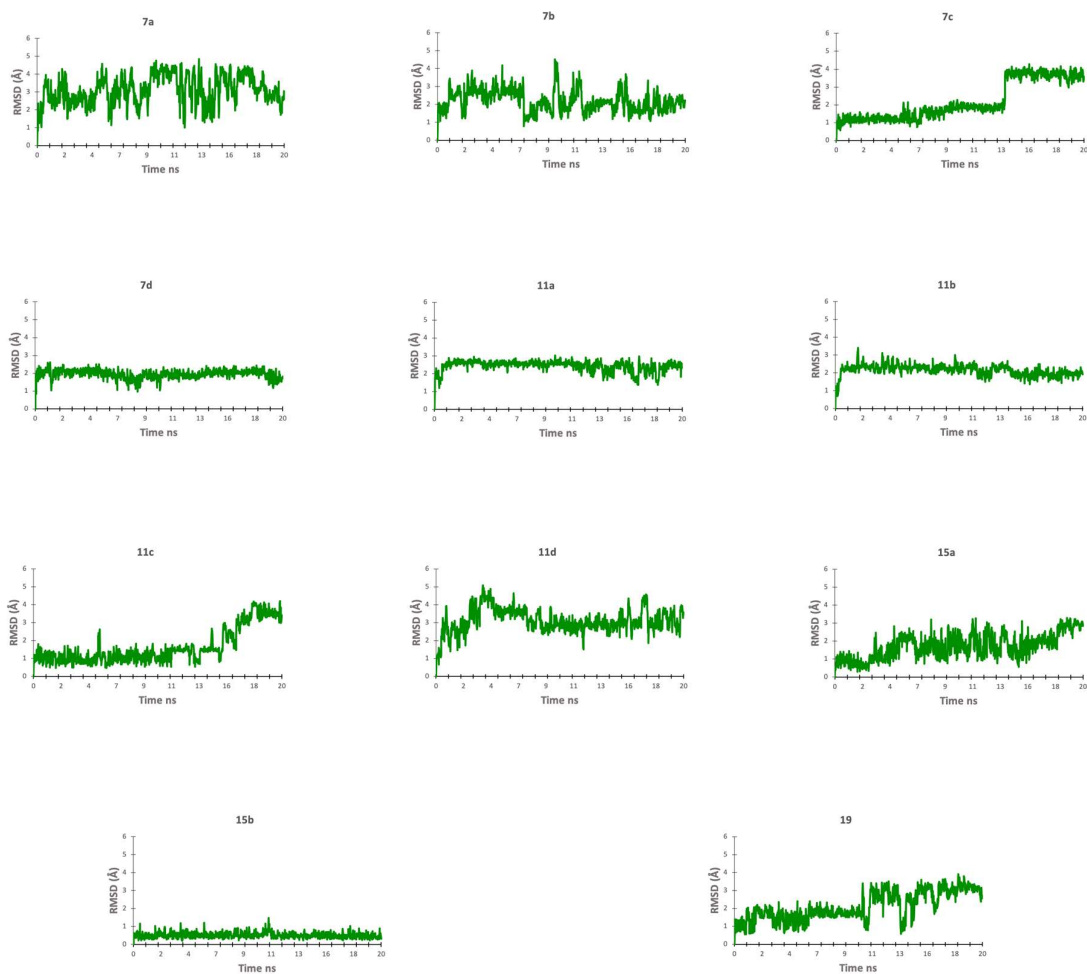

**Table 4S.** LC<sub>50</sub> values for **7c**, **11a-d** and **19** towards human tumor and pseudonormal cell lines in vitro

| Compound   | LC <sub>50</sub> values of compounds for cell line, $\mu\text{M}$ (M $\pm$ SD) |                  |                  |                   |                  |                  |                  |
|------------|--------------------------------------------------------------------------------|------------------|------------------|-------------------|------------------|------------------|------------------|
|            | Jurkat                                                                         | MCF-7            | HCT-116          | HEK293            | HL-60            | HL-60/adr        | HL-60/vinc       |
| <b>7c</b>  | 10,69 $\pm$ 1,50                                                               | 15,66 $\pm$ 2,54 | 4,22 $\pm$ 0,46  | 23,33 $\pm$ 4,44  | 7,67 $\pm$ 1,18  | 16,23 $\pm$ 1,70 | 17,56 $\pm$ 1,25 |
| <b>11b</b> | 10,04 $\pm$ 1,15                                                               | 9,97 $\pm$ 0,99  | 1,90 $\pm$ 0,24  | 13,61 $\pm$ 0,76  | 6,59 $\pm$ 0,96  | 10,63 $\pm$ 1,55 | 12,67 $\pm$ 3,50 |
| <b>11c</b> | 5,63 $\pm$ 0,78                                                                | 9,02 $\pm$ 0,90  | 3,10 $\pm$ 0,37  | 8,41 $\pm$ 1,28   | 4,69 $\pm$ 0,54  | 8,40 $\pm$ 1,23  | 2,49 $\pm$ 1,11  |
| <b>11d</b> | 14,17 $\pm$ 1,83                                                               | 27,75 $\pm$ 6,06 | 16,87 $\pm$ 3,90 | >30               | 29,69 $\pm$ 4,40 | 15,10 $\pm$ 1,59 | >30              |
| <b>15a</b> | >30                                                                            | 13,66 $\pm$ 2,67 | 8,67 $\pm$ 1,02  | >30               | >30              | >30              | >30              |
| <b>19</b>  | 21,80 $\pm$ 3,17                                                               | 13,55 $\pm$ 0,78 | 11,30 $\pm$ 1,01 | 24,47 $\pm$ 8,335 | >30              | >30              | 26,58 $\pm$ 6,05 |

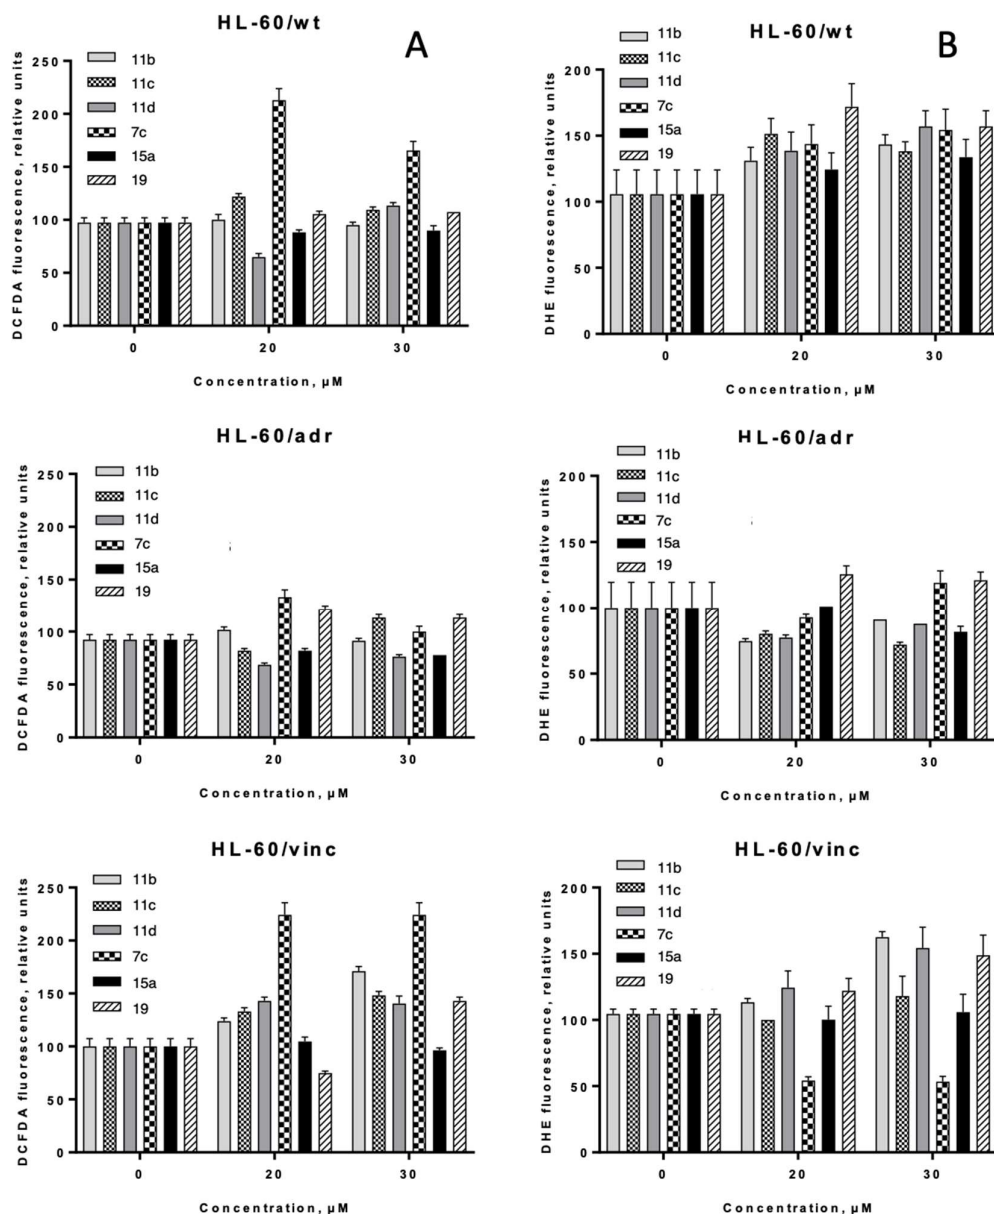

**Figure 8S.** Induction of reactive oxygen species (ROS) by the indicated CK2-HDAC dual inhibitors (10  $\mu$ M and 30  $\mu$ M, 24 hours) in HL-60, HL-60/adr and HL-60/vinc leukemia cells at 24h incubation DCFDA (A) and DHE (B) assays were used to visualize hydrogen peroxide and superoxide production and the respective fluorescence was measured at the single cell level in FACS analyses. One of three experiments delivering comparable data is shown.
